# Supplementary material for: Impact of Processing Technology on Macro- and Micronutrient Profile of Protein-Enriched Products from Fish Backbones
Source: MDPI journal article supplement (doi:10.3390/foods10050950), 2021-04-27
Supplement: s1 [file s1]

**Supplementary Table 1**, Average content of different micronutrients in 100 g of mechanically separated meat (MSM) and protein isolates of herring, salmon and cod.

| Amount in 100g wet product | Herring |                 | Salmon |                 | Cod    |                 |
|----------------------------|---------|-----------------|--------|-----------------|--------|-----------------|
|                            | MSM     | Protein isolate | MSM    | Protein isolate | MSM    | Protein isolate |
| EPA (mg/100 g WW)          | 313.80  | 75.60           | 4.40   | 1.20            | 60.60  | 79.60           |
| DPA (mg/100 g WW)          | 14.20   | 1.80            | 36.00  | 19.60           | 4.20   | 5.20            |
| EPA+DHA (mg/100 g WW)      | 328.00  | 77.40           | 40.40  | 20.80           | 64.80  | 84.80           |
| DHA (mg/100 g WW)          | 460.20  | 233.20          | 198.40 | 177.80          | 175.40 | 181.40          |
| Vit D (µg/100 g WW)        | 6.00    | 1.13            | 3.50   | 1.75            | 0.49   | 1.17            |
| Vit E (mg/100 g WW)        | 0.29    | ND              | 0.99   | 0.95            | 0.83   | 0.54            |
| Vit C (mg/100 g WW)        | 0.0035  | 0.0017          | 0.006  | 0.0011          | 0.0049 | 0.0011          |
| Protein (g/100g DM)        | 11.70   | 17.13           | 9.35   | 14.47           | 16.21  | 16.57           |
| Sodium (mg/100 g WW)       | 124.02  | 134.98          | 52.96  | 128.36          | 133.88 | 130.02          |
| Calcium (mg/100 g WW)      | 13.04   | 3.30            | 11.72  | 4.08            | 25.02  | 3.46            |
| Potassium (mg/100 g WW)    | 226.42  | 24.80           | 145.98 | 19.72           | 297.86 | 25.54           |
| Selenium (µg/100 g WW)     | 5.48    | 4.68            | 4.94   | 3.56            | 4.96   | 3.88            |
| Zinc (mg/100 g WW)         | 0.46    | 0.66            | 0.35   | 1.14            | 0.68   | 0.79            |
| Copper (mg/100 g WW)       | 0.10    | 0.20            | 0.05   | 0.22            | 0.09   | 0.22            |
| Iron (mg/100 g WW)         | 1.05    | 1.43            | 0.42   | 0.42            | 0.87   | 0.86            |
| Heme-iron (mg/100 g WW)    | 0.68    | 0.54            | 0.20   | 0.17            | 0.64   | 0.59            |
| Magnesium (mg/100 g WW)    | 25.72   | 1.10            | 12.62  | 1.50            | 23.66  | 1.40            |
| Manganese (mg/100 g WW)    | 0.04    | 0.11            | 0.08   | 0.09            | 0.12   | 0.12            |
